# Supplementary material for: A novel and selective silk fibroin fragmentation method
Source: Royal Society of Chemistry journal article supplement (doi:10.1039/d1sm00566a), 2021-01-01
Supplement: d1sm00566a1.pdf [file d1sm00566a1.pdf]

## Supporting Information

### A novel and selective silk fibroin fragmentation method

*Francesca Agostinacchio*<sup>a b</sup>, *Devid Maniglio*<sup>a b</sup>, *Emanuela Callone*<sup>a c</sup>, *Claudio Migliaresi*<sup>a b</sup>,  
*Sandra Dirè*<sup>a c</sup>, *Antonella Motta*<sup>a b \*</sup>

<sup>a</sup> Department of Industrial Engineering, University of Trento, via Sommarive 9, Trento, Italy

<sup>b</sup> BIOTech Research Center, European Institute of Excellence on Tissue Engineering and  
Regenerative Medicine, University of Trento, via delle Regole 101, Trento, Italy

<sup>c</sup> “Klaus Müller” Magnetic Resonance Laboratory, Department of Industrial Engineering,  
University of Trento, Via Sommarive 9, 38123 Trento, Italy

*\*Corresponding author: antonella.motta@unitn.it*

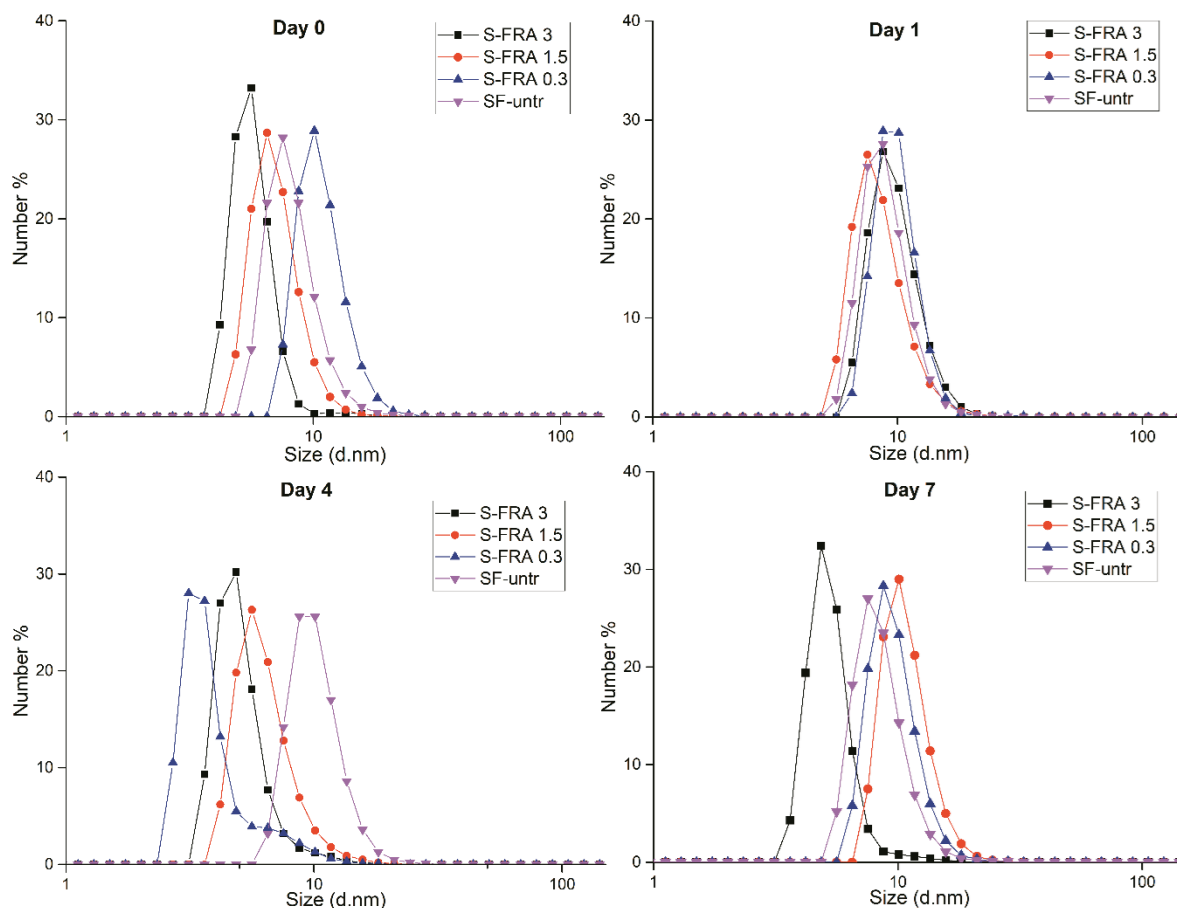

**Figure S1** DLS agglomeration kinetics and particles sizes of untreated silk (SF-untr), silk fragmented with 0.3 U/mL Col G (S-FRA 0.3), 1.5 U/ml (S-FRA 1-5), 3 U/mL (S-FRA 3), measured at day 0, 1, 4, and 7 after storage at 4°C and plot according to their number percentage

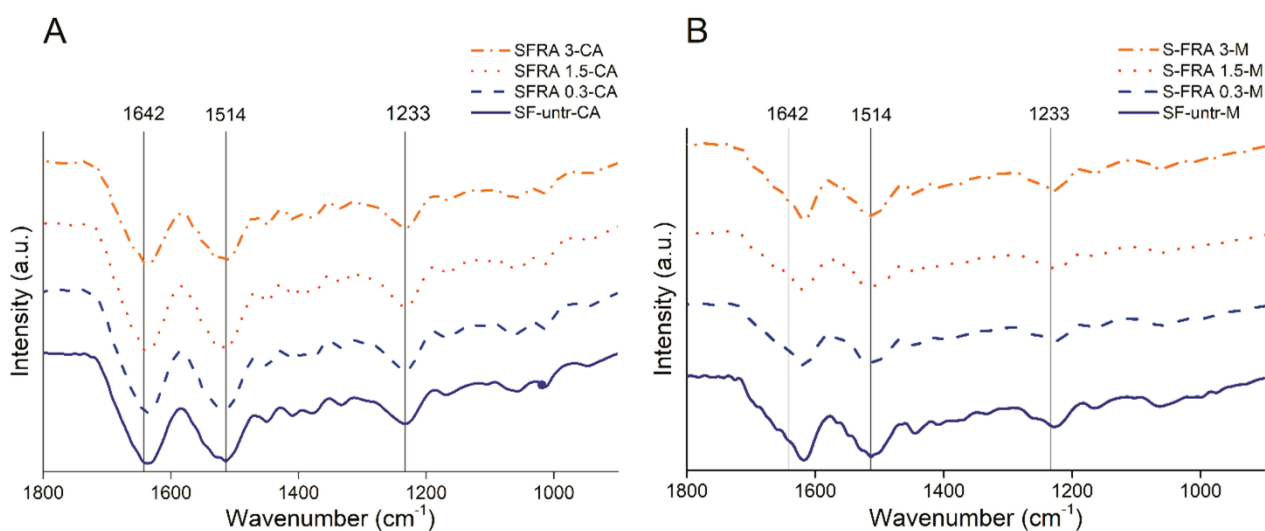

**Figure S2.** Comparison of FTIR spectra of untreated silk (SF-untr), silk fragmented with 0.3 U/mL Col G (S-FRA 0.3), 1.5 U/mL (S-FRA 1.5), 3 U/mL (S-FRA 3) prepared in form of films through the water-casting process (S1A) and later stabilized via methanol treatment (S1B)

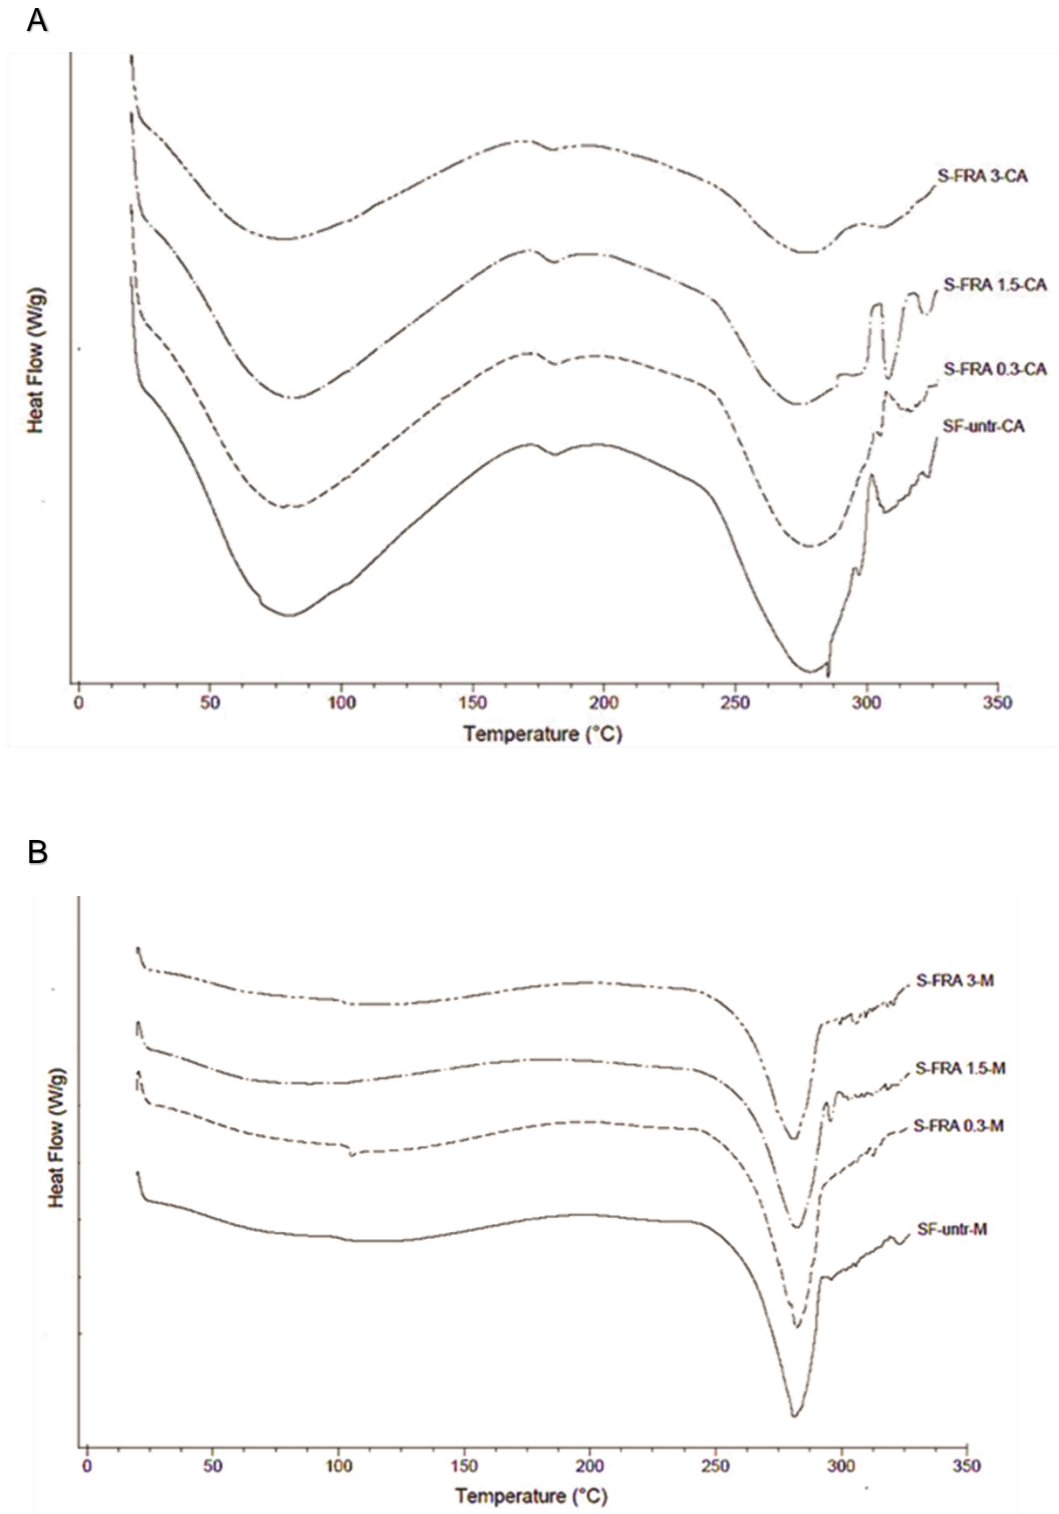

**Figure S3.** Comparison of DSC spectra of untreated silk (SF-untr), silk fragmented with 0.3 U/mL Col G (S-FRA 0.3), 1.5 U/mL (S-FRA 1.5), 3 U/mL (S-FRA 3) prepared in form of films via water casting (A), later stabilized via methanol treatment (B).

**Table S1.**  $^{13}\text{C}$  NMR chemical shifts and assignments. according to Callone et al. <sup>47</sup>

| $\delta$ (ppm) | Functional group       | Amino acid            | Secondary structure |
|----------------|------------------------|-----------------------|---------------------|
| 176.8          | C=O                    | Ala (Gln)             | Silk I-like/rc*     |
| 173.8          | C=O                    | Ala                   | Silk II             |
| 172.4          | C=O                    | Ser/Tyr/Gln, Phe, Pro | -                   |
| 170.7          | C=O                    | Gly                   | -                   |
| 155.5          | C $\xi$                | Tyr                   | -                   |
| 131.0          | C $\gamma$ /C $\delta$ | Tyr                   | -                   |
| 115.6          | C $\epsilon$           | Tyr                   | -                   |
| 64.3           | C $\beta$              | Ser                   | Silk II             |
| 60.6           | C $\beta$ / C $\alpha$ | Ser /Pro              | Silk I-like/rc      |
| 57.8           | C $\alpha$             | Ser                   | Silk I-like/rc      |
| 56.4           | C $\alpha$             | Ser/ Gln(Tyr)         | Silk II             |
| 51.5           | C $\alpha$             | Ala                   | Silk I-like/rc      |
| 49.6           | C $\alpha$ /C $\delta$ | Ala /Gln              | Silk II             |
| 43.7           | C $\alpha$             | Gly                   | -                   |
| 36.9           | C $\beta$              | Phe                   | -                   |
| 30.4           | C $\beta$ /C $\gamma$  | Gln/Pro               | rc                  |
| 20.6           | C $\beta$              | Ala                   | Silk II             |
| 17.3           | C $\beta$              | Ala                   | Silk I              |

\* rc : random coil

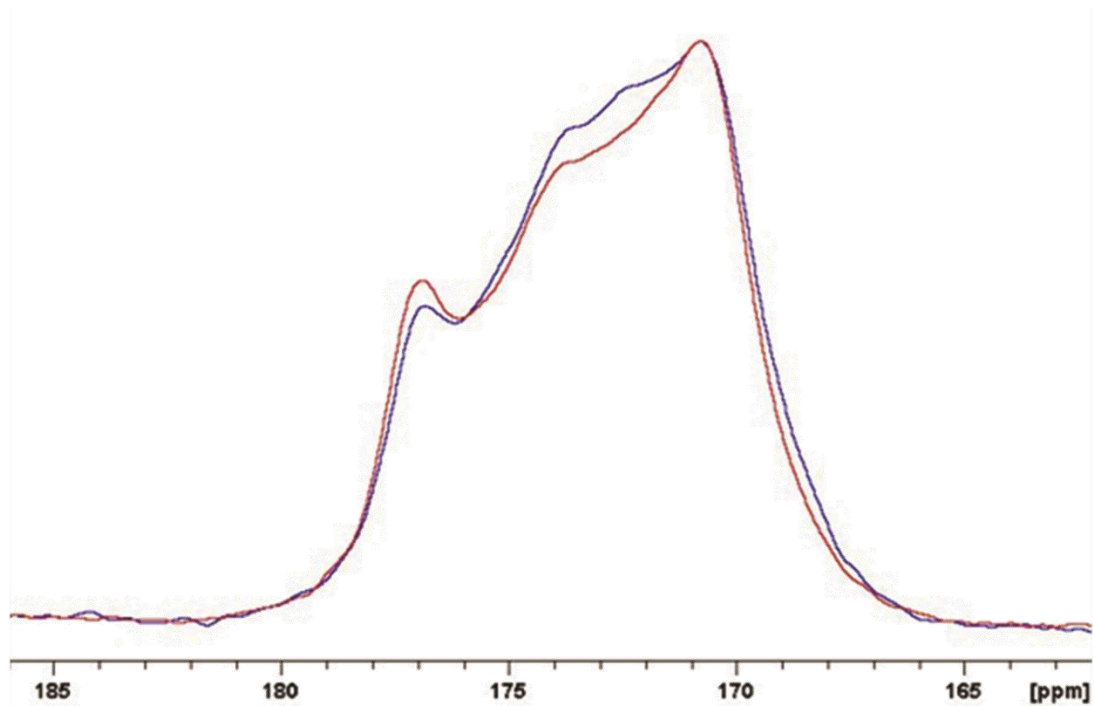

**Figure S4.** Superposition of the C=O resonances of the SF-untr-WV (blue line) and S-FRA3-WV (red line) samples.

It is interesting to note that the C=O peak, usually described with three components (Ala Silk I and II and Gly), shows at least four/five components, probably due to the characteristic peak sharpness induced by water-vapor treatment, which highlights also the contribution of Ser and Tyr to the C=O resonance.

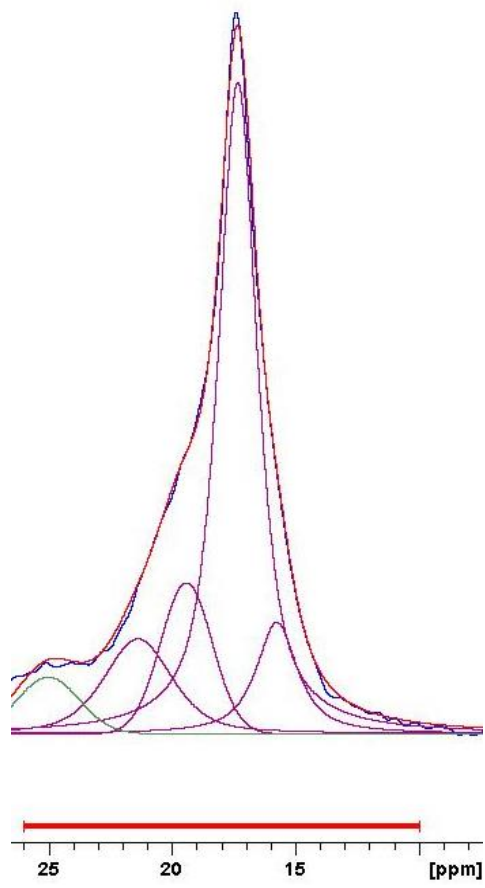

Figure S5. Profile fitting of Ala C $\beta$  peak of S-FRA 3 sample
